RESEARCH ARTICLE

# Synthesis and characterization of a magnetic adsorbent from negatively-valued iron mud for methylene blue adsorption

Jiancong Liu<sup>1</sup>, Yang Yu<sup>1,2</sup>, Suiyi Zhu<sup>1,3\*</sup>, Jiakuan Yang<sup>4</sup>, Jian Song<sup>4</sup>, Wei Fan<sup>1</sup>, Hongbin Yu<sup>1,3</sup>, Dejun Bian<sup>1</sup>, Mingxin Huo<sup>1,3\*</sup>

**1** Science and Technology Innovation Center for Municipal Wastewater Treatment and Water Quality Protection, Northeast Normal University, Changchun, China, **2** Key Laboratory of Songliao Aquatic Environment (Ministry of Education), Jilin Jianzu University, Changchun, China, **3** Engineering Lab for Water Pollution Control and Resources Recovery, Northeast Normal University, Changchun, China, **4** School of Environmental Science & Engineering, Huazhong University of Science and Technology, Wuhan, China

\* [papermanuscript@126.com](mailto:papermanuscript@126.com) (SZ); [huomx097@nenu.edu.cn](mailto:huomx097@nenu.edu.cn) (MH)

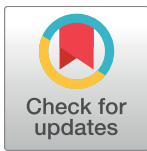

**OPEN ACCESS**

**Citation:** Liu J, Yu Y, Zhu S, Yang J, Song J, Fan W, et al. (2018) Synthesis and characterization of a magnetic adsorbent from negatively-valued iron mud for methylene blue adsorption. PLoS ONE 13 (2): e0191229. <https://doi.org/10.1371/journal.pone.0191229>

**Editor:** Yogendra Kumar Mishra, Institute of Materials Science, GERMANY

**Received:** July 26, 2017

**Accepted:** December 29, 2017

**Published:** February 2, 2018

**Copyright:** © 2018 Liu et al. This is an open access article distributed under the terms of the [Creative Commons Attribution License](https://creativecommons.org/licenses/by/4.0/), which permits unrestricted use, distribution, and reproduction in any medium, provided the original author and source are credited.

**Data Availability Statement:** All relevant data are within the paper and its Supporting Information files.

**Funding:** This work was supported by the National Natural Science Foundation of China (Granted No.51578118, 51238001, 51408110 and 51378098), the Major Science and Technology Program for Water Pollution Control and Treatment of China (Granted No. 2014ZX07201-011-004-2), the Jilin Provincial Natural Science Foundation (Granted No. 20150101072JC) and the Long-term

## Abstract

With increasing awareness of reduction of energy and CO<sub>2</sub> footprint, more waste is considered recyclable for generating value-added products. Here we reported the negatively-valued iron mud, a waste from groundwater treatment plant, was successfully converted into magnetic adsorbent. Comparing with the conventional calcination method under the high temperature and pressure, the synthesis of the magnetic particles (MPs) by Fe<sup>2+</sup>/Fe<sup>3+</sup> coprecipitation was conducted at environment-friendly condition using ascorbic acid (H<sub>2</sub>A) as reduction reagent and nitric acid (or acid wastewater) as leaching solution. The MPs with major component of Fe<sub>3</sub>O<sub>4</sub> were synthesized at the molar ratio (called ratio subsequently) of H<sub>2</sub>A to Fe<sup>3+</sup> of iron mud ≥ 0.1; while amorphous ferrihydrite phase was formed at the ratio ≤ 0.05, which were confirmed by vibrating sample magnetometer (VSM), X-ray diffraction (XRD) and X-ray photoelectron spectroscopy (XPS). With the ratio increased, the crystalline size and the crystallization degree of MPs increased, and thus the Brunauer-Emmett-Teller (BET) surface and the cation-exchange capacity (CEC) decreased. MPs-3 prepared with H<sub>2</sub>A to Fe<sup>3+</sup> ratio of 0.1 demonstrated the highest methylene blue (MB) adsorption of 87.3 mg/g and good magnetic response. The adsorption of MB onto MPs agreed well with the non-linear Langmuir isotherm model and the pseudo-second-order model. Pilot-scale experiment showed that 99% of MB was removed by adding 10 g/L of MPs-3. After five adsorption-desorption cycles, MPs-3 still showed 62% removal efficiency for MB adsorption. When nitric acid was replaced by acid wastewater from a propylene plant, the synthesized MPs-3w showed 3.7 emu/g of saturation magnetization (Ms) and 56.7 mg/g of MB adsorption capacity, 2.8 times of the widely used commercial adsorbent of granular active carbon (GAC). The major mechanism of MPs adsorption for MB was electrostatic attraction and cation exchange. This study synthesized a magnetic adsorbent from the negatively-valued iron mud waste by using an environment-friendly coprecipitation method, which had a potential for treatment of dye wastewater.

Program in “1000 Talent Plan for High-Level Foreign Experts” (Granted No. WQ20142200209).

**Competing interests:** The authors have declared that no competing interests exist.

**Abbreviations:** H<sub>2</sub>A, ascorbic acid; HA<sup>-</sup>, ascorbate; 2,3-DKG, L-diketogulonate; DHA, dehydroascorbic acid; GAC, HA granule active carbon; Fe(ACAC)<sub>3</sub>, iron(III) acetylacetonate; MB, methylene blue; MPs, magnetic particles; Ms, saturation magnetization; FWHM, full-width-at-half-maximum; FE-SEM, field emission scanning electron microscope; VSM, vibrating sample magnetometer; XPS, X-ray photoelectron spectroscopy; XRD, X-ray diffraction; BET, Brunauer-Emmett-Teller; CEC, cation exchange capacity.

## Introduction

With the trend of urbanization, more and more waste is generated in big cities and must be treated in a renewable and sustainable way. Iron mud waste was generated from the ground-water treatment plant and usually contains 3% solids, in which iron and other impurities, such as aluminum, calcium and waste fibers, were present. Iron mud waste are usually treated by naturally drying at the dumping site [1, 2] and the run-off of toxic compounds from it may contaminate nearby soil and water, a great threat of the environment [3]. With the tightening environmental regulations, chemical coagulation followed by mechanical filtration becomes a dominant method in iron mud disposal before sending to landfill, but the cost is high.

Over the past years, studies have been conducted to recover valuable materials from iron mud at aluminum refineries [4], plating factories [5] and steel company [6], such as pigments for mortar and concrete [5, 7], and adsorbents for removal of heavy metals [4, 8] and dyes [2]. In conversion of iron oxide in iron mud to magnetite for synthesis of adsorbent, hydrothermal treatment is usually used at 260°C with adding iron powder [9], roasting with pyrite [10] or charcoal, or injecting with reducing gas, such as H<sub>2</sub> [8], methane [11] or natural gas [12]. In our previously studies, a reduced temperature of 180°C was used to convert iron mud to MPs by using glycol as a reduction reagent [2]. However, in all the cases, significant energy is demanded in keeping the high temperatures and long heating hours in synthesis of the magnetic adsorbents. Thus, it is important to find an environment-friendly method to transform iron mud to magnetite. Coprecipitation of Fe<sup>2+</sup>/Fe<sup>3+</sup> mixed salt under alkaline conditions is cost-effective and scaled up easily, which has been widely used in preparing MPs recently [13]. Akin et al. reported [4] that Fe<sub>3</sub>O<sub>4</sub> nano-particles were coprecipitated by using FeCl<sub>2</sub>·4H<sub>2</sub>O and Fe<sup>3+</sup> solution after microwave digestion of iron mud. The resulting adsorbent had a high capacity of 0.4 mg/g in adsorbing arsenate from groundwater. Wu et al. [14] also reported that Fe<sub>3</sub>O<sub>4</sub> nano-particles were obtained by adding FeSO<sub>4</sub>·7H<sub>2</sub>O to HCl-digested iron ore tailings. Despite the Fe<sub>3</sub>O<sub>4</sub> particles were successfully synthesized in both studies, the production cost may be significantly increased by adding pure ferrous ions in coprecipitation.

It was reported that ascorbic acid (H<sub>2</sub>A) was applied in Fenton reaction to reduce Fe<sup>3+</sup>, Cu<sup>2+</sup> and Mn<sup>2+</sup> ions [15] to produce hydroxide radical for oxidation of organic pollutants [16]. Fe<sup>3+</sup> in iron mud can be partially reduced by H<sub>2</sub>A to generate Fe<sup>2+</sup> in MP *in situ* production. Therefore, Fe<sup>3+</sup> from iron mud waste was the sole iron source without adding pure Fe<sup>2+</sup> ions. Recently, H<sub>2</sub>A was successfully used by Gupta et al in Fe<sup>3+</sup>/Fe<sup>2+</sup> coprecipitation [17]. It was also used by Nene et al [18] to reduce Fe(ACAC)<sub>3</sub> in diphenyl-ether solution but the reactions had to be conducted by refluxing the reactants at a high temperature of 190°C for 1 hour. In the present study, Fe<sup>3+</sup> was partially reduced by H<sub>2</sub>A after iron mud was dissolved with nitric acid and the magnetic adsorbent was synthesized via Fe<sup>2+</sup>/Fe<sup>3+</sup> coprecipitation at room temperature. To further reduce the production cost, acid wastewater from a propylene plant was used to replace nitric acid in digestion of iron mud. The obtained MPs were further investigated to remove MB from a synthetic wastewater. To our knowledge, it was for the first time to report to synthesize Fe<sub>3</sub>O<sub>4</sub> particles at the environment-friendly room temperature by H<sub>2</sub>A reduction of Fe<sup>3+</sup> ions in low solid content of iron mud for Fe<sup>2+</sup>/Fe<sup>3+</sup> coprecipitation.

## Materials and methods

We had received approval from the Yatai-Longtan Cement Co. Ltd to collect iron mud from its groundwater plant. This study did not involve human participants, specimens or tissue samples, or vertebrate animals, embryos or tissues. In this study, no specific permissions were required for these locations/activities, and provide details on why this is the case. The field studies did not involve endangered or protected species.

## Materials

Iron mud was acquired from the groundwater treatment plant of Jilin Yatai cement company (China), and vacuum-dried at 80 °C for 2h before using for Fe<sub>3</sub>O<sub>4</sub> synthesis. The composition of iron mud was determined by X-ray fluorescence (XRF, ZSX Primus II, Rigaku, Japan). The major components of iron mud solids were quartz and albite and the content of total iron (Fe<sup>2+</sup> and Fe<sup>3+</sup>) was 16.6 wt%. Acid wastewater was acquired from the propylene plant of Jilin petrochemical company (S1 Table). Nitric acid and H<sub>2</sub>A were purchased from Sinopharm Chemical Reagent Co., Ltd. (Beijing, China). The chemically pure grade GAC was supplied by Tianjin Fuchen Chemical Reagent Factory (Tianjing, China).

## MPs preparation

0.8 g of the dried iron mud was mixed with 30 mL of 2% nitric acid under magnetic stirring over night. After iron mud was dissolved, the suspension was settled for 5 min before the reddish-brown supernatant was poured into a 50 mL Erlenmeyer flask. The flask was then placed into an anaerobic chamber and H<sub>2</sub>A was added to the supernatant to reduce Fe<sup>3+</sup> ions. After stirring for 15 min, the pH of the supernatant was adjusted to 9.5 by adding 5% NaOH dropwise. When the supernatant became turbid, the flask was heated at 80 °C for 2 h in a water bath for completing precipitation of MPs. The obtained MPs were washed three times in deionized water. Each wash was carried out for 3 min under 40k Hz ultrasound and the supernatant was removed by centrifuging at 5500 rpm for 5 min after washing. The prepared MPs were vacuum-dried at 40 °C overnight before storing at room temperature.

The effect of H<sub>2</sub>A on the adsorption capacity of the synthesized MPs to MB was investigated by changing the ratio of H<sub>2</sub>A to Fe<sup>3+</sup> ions (Fe<sup>3+</sup> ion in iron mud, the same in the following) from 0.01, 0.05, 0.1, 0.15 to 0.2, and the obtained particles were denoted as MPs-1, MPs-2, MPs-3, MPs-4 and MPs-5 respectively. MPs-3 was selected for the following adsorption experiments because of its high adsorption capacity. To reduce production cost, nitric acid was replaced by acid wastewater as the dissolving reagent in MP synthesis, and thus synthesized MPs were named as MPs-3w.

## MB adsorption

**Sorption kinetics studies.** The kinetics studies were conducted by mixing 0.015 g of MPs with 20 mL of 60 mg/L MB in a series of nine groups of 50 mL Erlenmeyer flasks. The flasks were sealed with parafilm and shaken for 2h at 150 rpm at 25 °C in a shaking incubator (HZQ-X300, Yiheng, Shanghai, China). During adsorption, one group of the flasks was taken out from the incubator at a given interval, and MB residue in the supernatant was determined by using a UV-vis spectrophotometer (Purkinje General, China) at 655 nm [19] in the reading range of 0.01 to 0.14, which measured MB concentrations between 0.1 mg/L and 0.8 mg/L.

The adsorption capacity of MPs to MB ( $q_e$ , mg/g) was calculated using the following equation:

$$q_e = \frac{(C_0 - C_e) \times V}{m} \quad (1)$$

Herein,  $C_0$  and  $C_e$  were the initial and equilibrium MB concentrations (mg/L);  $V$  was the volume (L) of the MB solution and  $m$  was the mass of MPs (g) used in MB adsorption.

**Sorption isotherm models analysis.** The sorption isotherm studies were conducted according to the method described by Ramasamy et al. [19]. The initial MB concentrations were 10, 30, 60, 100, 150, 200 and 300 mg/L, respectively, and the equilibrium time was 2h. All data was the average of triplicate experiments.

**Regeneration studies.** MPs-3 had the highest adsorption capacity among the synthesized MPs and was used for regeneration experiments. After equilibrium adsorption of MB with initial concentration of 60 mg/L, the MB-adsorbed MPs-3 was collected with a magnet and then resuspended in 20 mL of deionized water with pH from 1 to 11 to select the best pH for regeneration, followed by shaking at 150 rpm in a shaking incubator (HZQ-300, Yiheng, Shanghai, China) for 24 hours until the MB concentration stabilized according to Yan et al. [20]. The final MB concentrations in solution were measured based on Ramasamy et al. [19]. The desorption efficiency ( $R_d$ ) was calculated using Eq (2).

$$R_d = \frac{C_d \times V_d}{q_e \times m} \times 100\% \quad (2)$$

Where  $C_d$  was the final MB concentration after desorption (mg/L);  $V_d$  was the volume of aqueous solution in the desorption (L);  $m$  was the mass of MPs-3(g) used in MB adsorption.

After desorption, MPs-3 was magnetically isolated from the solution and washed several times with deionized water until pH = 7, followed by suspending in 60 mg/L of MB for the second round of adsorption. The adsorption-desorption cycles were carried out five times, and the re-adsorption efficiency ( $R_a$ ) was calculated with the following equation.

$$R_a = \frac{C_a \times V_a}{q_e \times m} \times 100\% \quad (3)$$

Where  $C_a$  was the equilibrium concentration of MB in solution (mg/L);  $V_a$  was the volume of aqueous solution (L).

**The column study.** Column experiment was conducted in a plexiglass column with the inner diameter of 22 mm and the height of 110 mm. The concentration of MB solutions was 100 mg/L. Temperature and the initial pH were 25 °C and 7.2, separately. The flow rate was controlled at 2 mL/min with a peristaltic pump (HL-1D, Huxi, Shanghai, China). At a given interval, the effluent was sampled for MB determination.

**The pilot study.** The pilot experiment was performed by using 2L of synthesized wastewater containing 100 mg/L MB with MPs-3 at concentrations of 0.75, 1.5, 2.5, 5, 7.5 and 10 g/L, respectively, in 5L buckets, on which a shafted propeller (OS20, Dalong, Beijing, China) was mounted and agitated at 300 rpm. After 2 hour, MPs-3 was separated from the supernatant with a magnet and the supernatant was analyzed for MB residue.

## Characterization of MPs

The saturation magnetization ( $M_s$ ) of MPs and iron mud was determined by a magnetometer (Quantum Design, USA) with a SQUID-VSM system. The XRD patterns were conducted for phase identification using a diffractometer (RAPID-S, Rigaku, Japan) with Cu K $\alpha$  radiation. The crystallization degree of MPs was analyzed by using Materials Studio software (V 6.0, Accelrys, USA) based on intensity and width of the standard peak of crystalline Fe<sub>3</sub>O<sub>4</sub> phase compared to the background peaks. The average crystallite size of MPs was calculated with the Debye-Scherrer equation:

$$D = \frac{0.94 \times \lambda}{B \times \cos\theta} \quad (4)$$

Where  $D$  was the average crystallite size of MPs (nm),  $\lambda$  was the wavelength of the X-ray source (nm),  $B$  was the full width at half maximum (FWHM) of an individual peak (rad), and  $\theta$  was the diffraction angle (°).

Compositions of MPs were determined by X-ray fluorescence (ARLADVANT XP<sup>+</sup>, Thermo, USA). The chemical state information on the particle surface was determined with an

X-ray photoelectron spectrometer (ADES-400, VG, U.K.) using non-monochromated Mg K $\alpha$  X-ray source. Particle morphologies were observed through a field emission scanning electron microscope (FE-SEM, FEI Co., USA) using a working voltage of 200 kV. The Brunauer-Emmett-Teller (BET) surface area of MPs was determined through nitrogen adsorption-desorption measurements (TriStar 3000, Micromeritics, USA). The Fourier transform infrared spectra were determined by a spectrometer (Nicolet 6700, Thermo, USA) using KBr wafer in the wavenumber range of 4000 cm<sup>-1</sup> to 400<sup>-1</sup>. The zeta potential of MPs was measured by zeta potential analyzer (mastersizer 3000E, Malvern UK). Before analysis, 0.1 g MPs was suspended in 50 mL of KCl solution with concentration of 0.01 mol/L. pH of the suspension was adjusted from 1.4 to 10.7 by adding 1 M HCl or 1 M NaOH solutions, and agitated for 24 h. Then 1 mL sample was taken out for zeta potential analysis.

## Results and discussion

### Iron mud and MP composition

As demonstrated in Fig 1, the major elements of iron mud waste were Ca (2.4%), Al (6.2%), Fe (16.6%) and Si (19.8%) but Fe was dominant in the synthesized MPs (Fig 1). When iron mud was treated with nitric acid/acid wastewater, Fe and some metals leached out from mud into the liquid fraction, leaving some other elements mostly in the solid fraction, such as Mg, K, Ca, Al and Si. After separation from the solid fraction, Si was totally removed from, while Fe in the liquid fraction was re-precipitated to Fe<sub>3</sub>O<sub>4</sub> under alkaline conditions and its content gradually increased when more H<sub>2</sub>A was added from MPs-1 to MPs-5 (Fig 1), indicating the crystallization of Fe<sub>3</sub>O<sub>4</sub> increased with more available Fe<sup>2+</sup>. However, Na<sup>+</sup> decreased from MPs-1 to MPs-5 because sizes of MPs increased with the increased crystallization, which led to the smaller

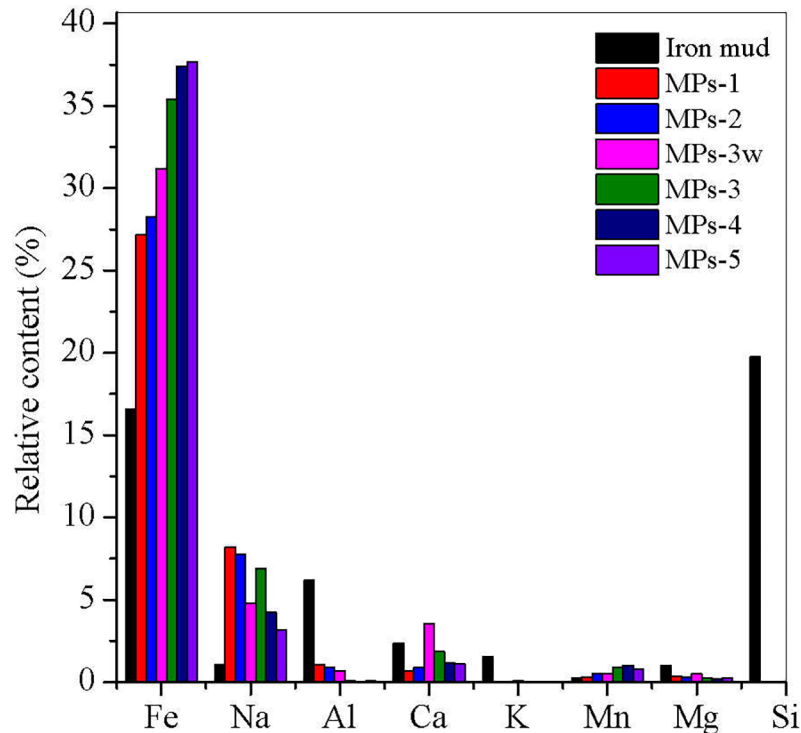

**Fig 1. Major elements in iron mud and MPs.** MPs 1–5 were synthesized by changing the molar ratio of ascorbic acid to Fe<sup>3+</sup> from 0.01 to 0.05, 0.1, 0.15 and 0.2, respectively. MPs-3w was prepared at the molar ratio of 0.1 with acid wastewater digestion.

<https://doi.org/10.1371/journal.pone.0191229.g001>

surface area to support the functional groups (which will be discussed in the following sections). In the coprecipitation process,  $\text{Na}^+$  served as a ligand and was adsorbed onto the MP's surface. The poorly crystalline iron oxide had a larger surface area, which support more functional groups for  $\text{Na}^+$  adsorption [21]. Large quantity of Ca was present in the acid wastewater (S1 Table), which increased Ca content in MPs-3w and negatively affected the adsorption.

### Mechanism of $\text{Fe}_3\text{O}_4$ synthesis

After  $\text{H}_2\text{A}$  was added in the liquid fraction, Fenton reaction occurred in the presence of dissolved oxygen and  $\text{Fe}^{3+}$ . Basically,  $\text{H}_2\text{A}$  was firstly converted to ascorbate ( $\text{HA}^-$ ) after losing protons at its 2- or 3- positions, which were then replaced by  $\text{Fe}^{3+}$  ions [22, 23]. The attached  $\text{Fe}^{3+}$  ions were rapidly reduced to  $\text{Fe}^{2+}$ , while  $\text{HA}^-$  was oxidized to  $\text{HA}\cdot$  [24]. Finally, the formed  $\text{HA}\cdot$  was captured by dissolved oxygen and quickly oxidized to dehydroascorbic acid (DHA) [23, 25] with formation of  $\text{H}_2\text{O}_2$ . The reactions were enhanced when the solution was exposed to the atmosphere. Other metal ions, such as  $\text{Mn}^{2+}$ ,  $\text{Cu}^{2+}$  and  $\text{Zn}^{2+}$ , worked in a similar way in catalytic oxidation of  $\text{H}_2\text{A}$  [26]. The resulting  $\text{Fe}^{2+}$  and other reduced ions, were re-oxidized by hydrogen peroxide to complete the cycle to form  $\text{Fe}^{3+}$  and other oxidized ions. Equations of the reactions were described as follow:

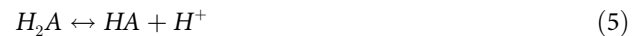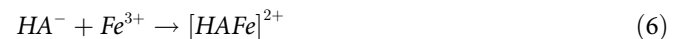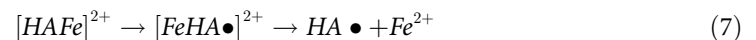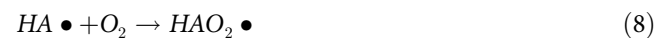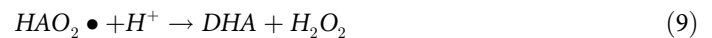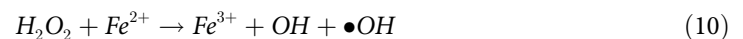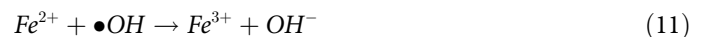

DHA was unstable and easily hydrolyzed to L-diketogulonate (2,3-DKG) at pH 7 [24, 27]. In the presence of high concentration of  $\text{H}_2\text{O}_2$ , both DHA and 2,3-DKG was oxidized and broken down rapidly to L-threonate and oxalate [28].

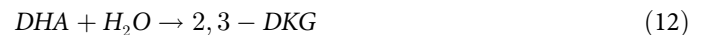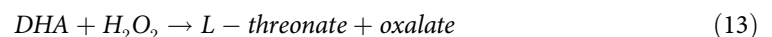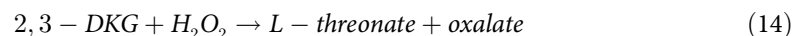

After the dissolved oxygen in the liquid fraction exhausted,  $\text{H}_2\text{O}_2$  was not produced. Therefore, stable  $\text{Fe}^{2+}$  was formed by continuous reduction of  $\text{Fe}^{3+}$  with  $\text{H}_2\text{A}$ .  $\text{Fe}^{2+}$  tended to coprecipitate with  $\text{Fe}^{3+}$  when the two types of ions were present under high pH (Eq 15), which resulted in formation of  $\text{Fe}_3\text{O}_4$  particles.

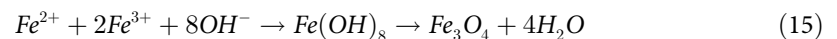

## Magnetization measurement

As shown in Fig 2, MPs-3, MPs-4, MPs-5M and MPs-3w demonstrated strong magnetism with low remanence and coercivity, indicating these MPs had soft magnetism and easily removed from the treated water by simply placing a magnetic field after MB adsorption (see graph abstract). By increasing the  $H_2A/Fe^{3+}$  ratio, the saturation magnetization ( $M_s$ ) increased from 3.7, 4.6, 5.9 to 7.1 emu/g for MPs-3w, MPs-3, MPs-4 and MPs-5, respectively, which indicated magnetic response became stronger with increasing  $Fe^{2+}/Fe^{3+}$  ratio. Similar to iron mud, MPs-1 and MPs-2 were synthesized with lower  $H_2A/Fe^{3+}$  ratios, demonstrated weak magnetic response, and would not be considered in the following studies.

In precipitation of  $Fe_3O_4$ , it nucleated when  $Fe^{2+}$  concentration reached the critical supersaturation level, and the nuclei grew by diffusing  $Fe^{2+}$  to the surface of  $Fe_3O_4$  [29]. When the  $H_2A/Fe^{3+}$  ratio was smaller than 0.05, the limited  $H_2A^-$  was completely exhausted by dissolved oxygen and other cations, such as  $Mn^{4+}$  [15, 30], resulting in inadequate  $Fe^{2+}$  accumulation for nucleation of ferrihydrite (Fig 3A). The strongest  $M_s$  was generated when the  $Fe^{2+}/Fe^{3+}$  ratio was between 0.67 and 1 in MPs coprecipitation and the small  $Fe^{2+}/Fe^{3+}$  ratio led to a weak magnetic response [31]. The magnetic response of  $Fe_3O_4$  was size-dependent. When the  $Fe^{2+}/Fe^{3+}$  ratio increased, the size of  $Fe_3O_4$  particles increased [32] and the magnetic response increased correspondingly (Fig 2). The large size of  $Fe_3O_4$  particles reduced the surface to volume ratio, which may decrease the thermal fluctuation and magnetic disorder of  $Fe_3O_4$  molecules, leading to strong magnetic response [33].

A acid wastewater with a pH of 0.61 from a propylene plant, which mainly contained acid species of  $Cl^-$  (3992.5mg/L),  $NO_3^-$  (444.4mg/L) and  $SO_4^{2-}$  (22492.2mg/L) (S1 Table), was tested

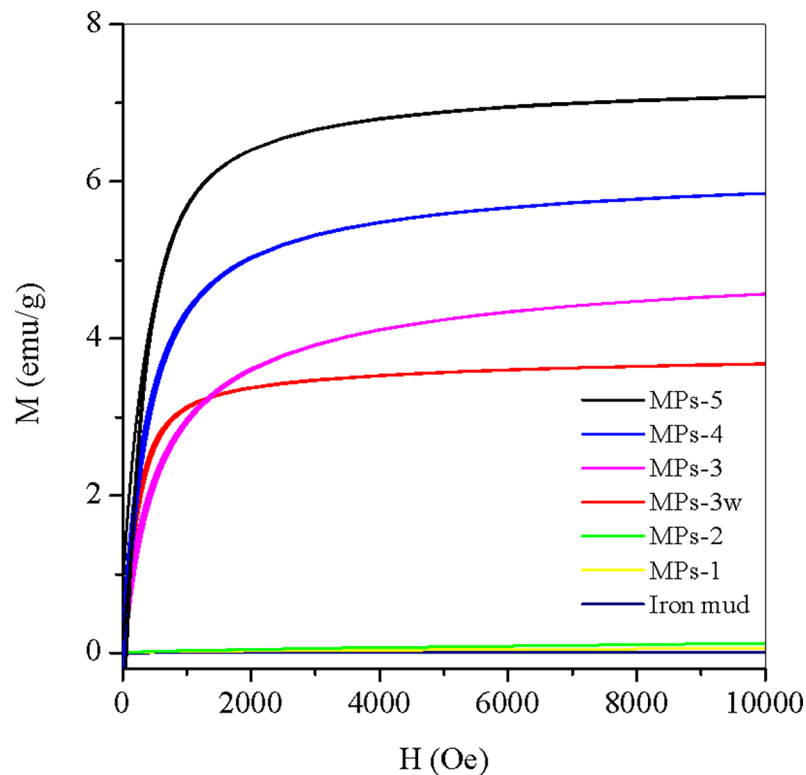

**Fig 2. Magnetic hysteresis loops of iron mud and MPs.** MPs 1–5 were synthesized by changing the molar ratio of ascorbic acid to  $Fe^{3+}$  from 0.01 to 0.05, 0.1, 0.15 and 0.2, respectively. MPs-3w was prepared at the molar ratio of 0.1 with acid wastewater digestion.

<https://doi.org/10.1371/journal.pone.0191229.g002>

to replace the commercial nitric acid in dissolving iron mud for Fe<sub>3</sub>O<sub>4</sub> production. The wastewater also contained 185.9 mg/L of Fe<sup>3+</sup>, which could contribute to iron species in MP synthesis. However, significant amount of Ca<sup>2+</sup> (3736.1 mg/L) and other impurities of ion species may interrupt the reactions (S1 Table). The synthesized MPs using acid wastewater as a dissolving reagent (MPs-3w) demonstrated an Ms of 3.7 emu/g, slightly lower than 4.6 emu/g of MPs-3 (Fig 2), probably because the generated gypsum by Ca<sup>2+</sup> and SO<sub>4</sub><sup>2-</sup> precipitation negatively affected the unit magnetite of Fe<sub>3</sub>O<sub>4</sub>. It was reported that Ms was greatly reduced to half from 57.8 emu/g to 25 emu/g when Fe<sub>3</sub>O<sub>4</sub> particles were coated by Zr(SO<sub>4</sub>)<sub>2</sub> [34]. However, it was significant that the commercial nitric acid could be replaced by the negatively valued wastewater to reduce the cost of Fe<sub>3</sub>O<sub>4</sub> production. Currently, studies are being carried out to synthesize Fe<sub>3</sub>O<sub>4</sub> with the reduced gypsum in acid wastewater.

### XRD analysis

XRD was used to characterize the crystallography of the obtained MPs. The XRD patterns of iron mud and the synthesized MPs were shown in Fig 3A and 3B, respectively with controls of ferrihydrite and magnetite. The main peaks corresponding to 2θ of 34° and 61° in MPs-1 and MPs-2 were related to the poorly crystallized ferrihydrite (Fig 3A) [35]. For iron mud, the impurities, such as quartz and albite, were reflected by the intensities of diffraction peaks, which covered the main peak of the poor crystallized iron oxide at 2θ of 34° (Fig 3B). The reflection peaks at 2θ of 30.1°, 35.4°, 43.2°, 53.4°, 57.2° and 62.7°, attributing to diffractions from the planes of (220), (311), (400), (422), (511), (440) of magnetite Fe<sub>3</sub>O<sub>4</sub> (JCPDS 76–1849) with cubic spinel structure, were observed in the synthesized MPs-3w, MPs 3–5, and the magnetite control (Fig 3B), indicating Fe<sub>3</sub>O<sub>4</sub> was present in MPs. In addition, the peaks observed in MPs-3w at 2θ = 20.9° and 29.3° were affiliated to gypsum (JCPDS 33–0311) [36], which was due to CaSO<sub>4</sub> precipitation at pH 9.5 because of high concentrations of Ca<sup>2+</sup> and SO<sub>4</sub><sup>2-</sup> in the acid wastewater (S1 Table).

The crystallite sizes were calculated by using FWHM of the strongest peak (311), which were 3.16, 4.35, 7.56 and 18.32 nm for MPs-3w and MPs 3–5, respectively. The results demonstrated that by increasing the H<sub>2</sub>A/Fe<sup>3+</sup> ratio, the average sizes of MP crystallite increased

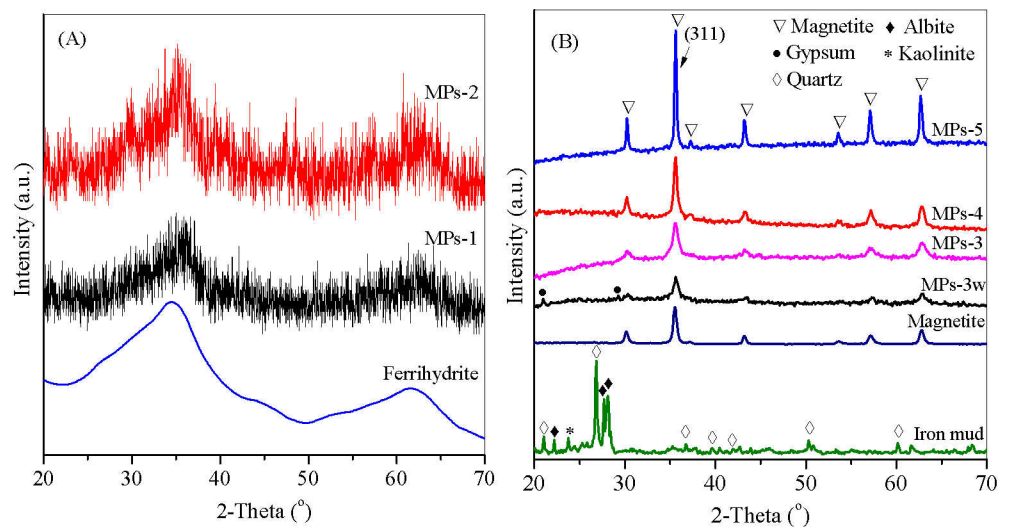

**Fig 3. XRD pattern of (A) MPs-1, MPs-2 and ferrihydrite, and (B) MPs-3w, MPs-3, MPs-4, MPs-5 and Iron mud.** MPs 1–5 were synthesized by changing the molar ratio of ascorbic acid to Fe<sup>3+</sup> from 0.01 to 0.05, 0.1, 0.15 and 0.2. MPs-3w was prepared at the ratio of 0.1 with acid wastewater digestion.

<https://doi.org/10.1371/journal.pone.0191229.g003>



accordingly. The result was consistent with the studies of Samaneh et al., in which the average crystallite size of magnetite increased almost double from 9.07 to 18.97 nm when the  $\text{Fe}^{2+}/\text{Fe}^{3+}$  ratio was increased from 0.5 to 2 [32]. In preparing MPs-3w, acid wastewater containing  $\text{Fe}^{3+}$  replaced nitric acid and contributed iron species in  $\text{Fe}_3\text{O}_4$  synthesis. The combined  $\text{Fe}^{3+}$  for MPs-3w led to a lower  $\text{Fe}^{2+}/\text{Fe}^{3+}$  ratio and therefore a smaller particle size of 3.16 nm.

It was demonstrated that amorphous iron oxide had higher surface area than the crystallized one (Fig 3), which exposed more ion-exchange functional groups on the surface [37, 38]. Among the selected MPs in MB adsorption, MPs-3 was least crystallized and had the largest surface area as demonstrated by the BET analysis in the following  $\text{N}_2$  adsorption isotherms, which contained the most functional groups and the highest adsorption capacity. When the  $\text{H}_2\text{A}/\text{Fe}^{3+}$  ratio increased steadily from MPs-3 to MPs-5, the synthesized MPs became more crystallized, reducing the surface area and functional groups on it, which was consistent with the reduced MB adsorption capacity shown in the following isothermal equilibrium. This result was consistent with the observation of Zhang et al. that amorphous  $\text{Fe}_3\text{O}_4$  showed better adsorption capacity to Pb(II) and Cd(II) than the well crystallized  $\alpha$ - and  $\gamma$ -  $\text{Fe}_2\text{O}_3$  [37]. It was reported that after ferrihydrite was converted to more crystallized goethite, its adsorption capacity to radium decreased from nearly 100% to 20% [39].

### XPS analysis

To further investigate the valence states of Fe and O in iron mud and MPs, O1s and Fe2p spectra of XPS were analyzed and the two spectra demonstrated consistent results. In O1s spectrum, the Fe-O peak at 529.6 eV was observed in MPs-3w and MPs-3 to 5, indicating the formation of  $\text{Fe}_3\text{O}_4$  [40]. The peak at 712.3 eV and 726.4 eV was shown in Fe2p spectrum of MPs 1–2, representing Fe 2p<sub>3/2</sub> and Fe 2p<sub>1/2</sub> of ferric species in ferrihydrite (Fig 4B) [41]. By increasing the  $\text{HA}/\text{Fe}^{3+}$  ratios, Fe 2p<sub>3/2</sub> and Fe 2p<sub>1/2</sub> shifted to 711 eV and 725 eV, respectively for MPs 3–5, corresponding the increased  $\text{Fe}^{2+}/\text{Fe}^{3+}$  ratios in MPs. The results indicated that  $\text{Fe}_3\text{O}_4$  content increased by increasing  $\text{HA}/\text{Fe}^{3+}$  ratios, which corresponded to the increased magnetic response from MPs-1 to MPs-5 demonstrated in Fig 2A.

### SEM analysis

The morphology of iron mud and MPs was characterized by SEM. As shown in Fig 5A, iron mud was about 200 nm particles with smooth surface. The morphologies of MPs-1 and MPs-2 were irregular because of the formation of amorphous ferrihydrite (Fig 5B and 5C). When more  $\text{H}_2\text{A}$  was added, more  $\text{Fe}^{2+}$  was generated, which was favorable to the nuclei growth of  $\text{Fe}_3\text{O}_4$  and led to bigger size of MPs (Fig 5D–5G). The result was consistent with the XRD spectrum and magnetic response.

### Sorption of MB

**Sorption kinetics.** MPs-3w and MPs 3–5 had good magnetic response, and were further studied for MB adsorption, in which the widely used MB adsorbent of GAC was a reference. Time-course of MB adsorption on MPs and GAC were investigated as shown in Fig 6. MPs and GAC showed similar adsorption trend. The adsorption capacity increased rapidly at the initial 30 min, and slowly in the following 90 min, and kept constant within the subsequent 120 min, indicating the adsorption was equilibrated in 120 min. The kinetics of adsorption of MB on MPs-3w, MPs 3–5 and GAC were studied as a function of adsorption time at 25 °C. As shown in Fig 6, four typical kinetic models, such as Lagergren's pseudo-first order (Eq 16), pseudo-second order kinetics model (Eq 17), inter-particle diffusion model (Eq 18) and kinetic model (Eq 19) proposed by Elovich et al. [42], were tested for the experimental data. The four

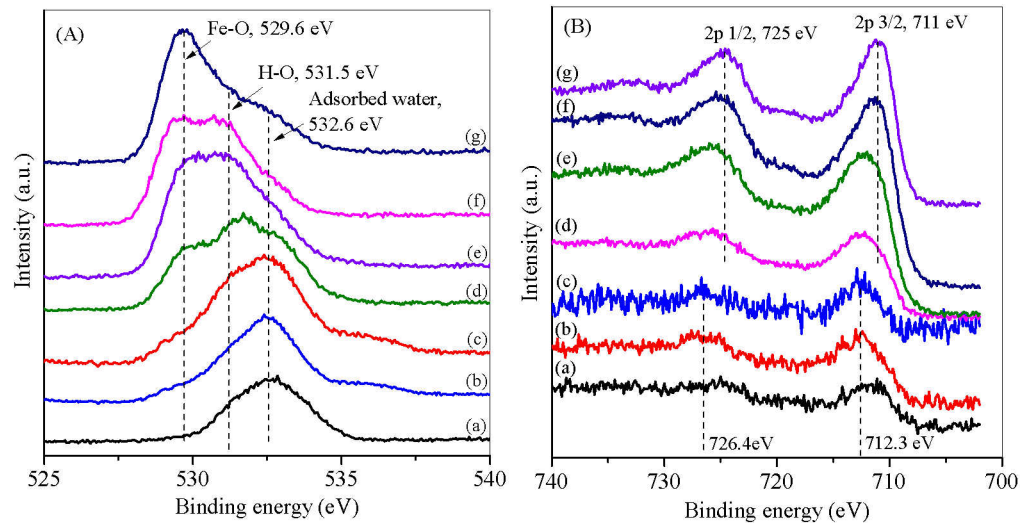

**Fig 4. XPS O1s (A) and Fe2p (B) core-level spectra of iron mud (a) and MPs-1 (b), MPs-2 (c), MPs-3w (d), MPs-3 (e), MPs-4 (f) and MPs-5 (g).** MPs 1–5 were synthesized by changing the molar ratio of ascorbic acid to Fe<sup>3+</sup> from 0.01 to 0.05, 0.1, 0.15 and 0.2. MPs-3w was prepared at the ratio of 0.1 with acid wastewater digestion.

<https://doi.org/10.1371/journal.pone.0191229.g004>

kinetics models were expressed as follows:

$$\ln(q_e - q_t) = \ln q_e - k_1 t \tag{16}$$

$$\frac{t}{q_t} = \frac{1}{k_2 q_e^2} + \frac{t}{q_e} \tag{17}$$

$$q_t = k_i t^{0.5} + C \tag{18}$$

$$q_t = \frac{1}{\beta} \ln(\alpha\beta) + \frac{1}{\beta} \ln(t) \tag{19}$$

Where,  $q_e$  and  $q_t$  are the equilibrium adsorption capacity (mg/L) and the adsorption capacity (mg/L) at  $t$  min, respectively.  $k_1$  is the pseudo-first-order model rate constant ( $\text{min}^{-1}$ ). In Eq (17),  $k_2$  is the pseudo-second-order adsorption rate constant (g/mg.min). In Eq (18),  $k_i$  is the intra-particle diffusion constant (mg/g.  $\text{min}^{1/2}$ ). In Eq (19),  $\alpha$  and  $\beta$  is the initial adsorption rate (g/mg.min) and desorption constant (mg/g.min), separately.

The parameters obtained from the four kinetic models are in Table 1, which showed the pseudo-second-order model had the highest R<sup>2</sup> values in the four kinetics models. All R<sup>2</sup> values of pseudo-second-order model were larger than 0.999, suggested that pseudo-second-order model was the best fit for the experimental data, indicating. MPs-3 exhibited the highest  $k_2$  value of 0.0254 g/mg. min than other MPs and GAC, indicated that MPs-3 has the highest adsorption rate.

**Isothermal equilibrium study.** To further investigate the sorption mechanism, the sorption isotherms of MB on MPs and GAC were measured, respectively. Six of the most established isotherm models, such as langmuir isotherm (Eq 20), Freundlich isotherm (Eq 21), Redlich-Peterson isotherm (Eq 22), Tempkin isotherm (Eq 23), Sips isotherm (Eq 24) and Toth isotherm (Eq 25), were used to test the experimental data and the equations were

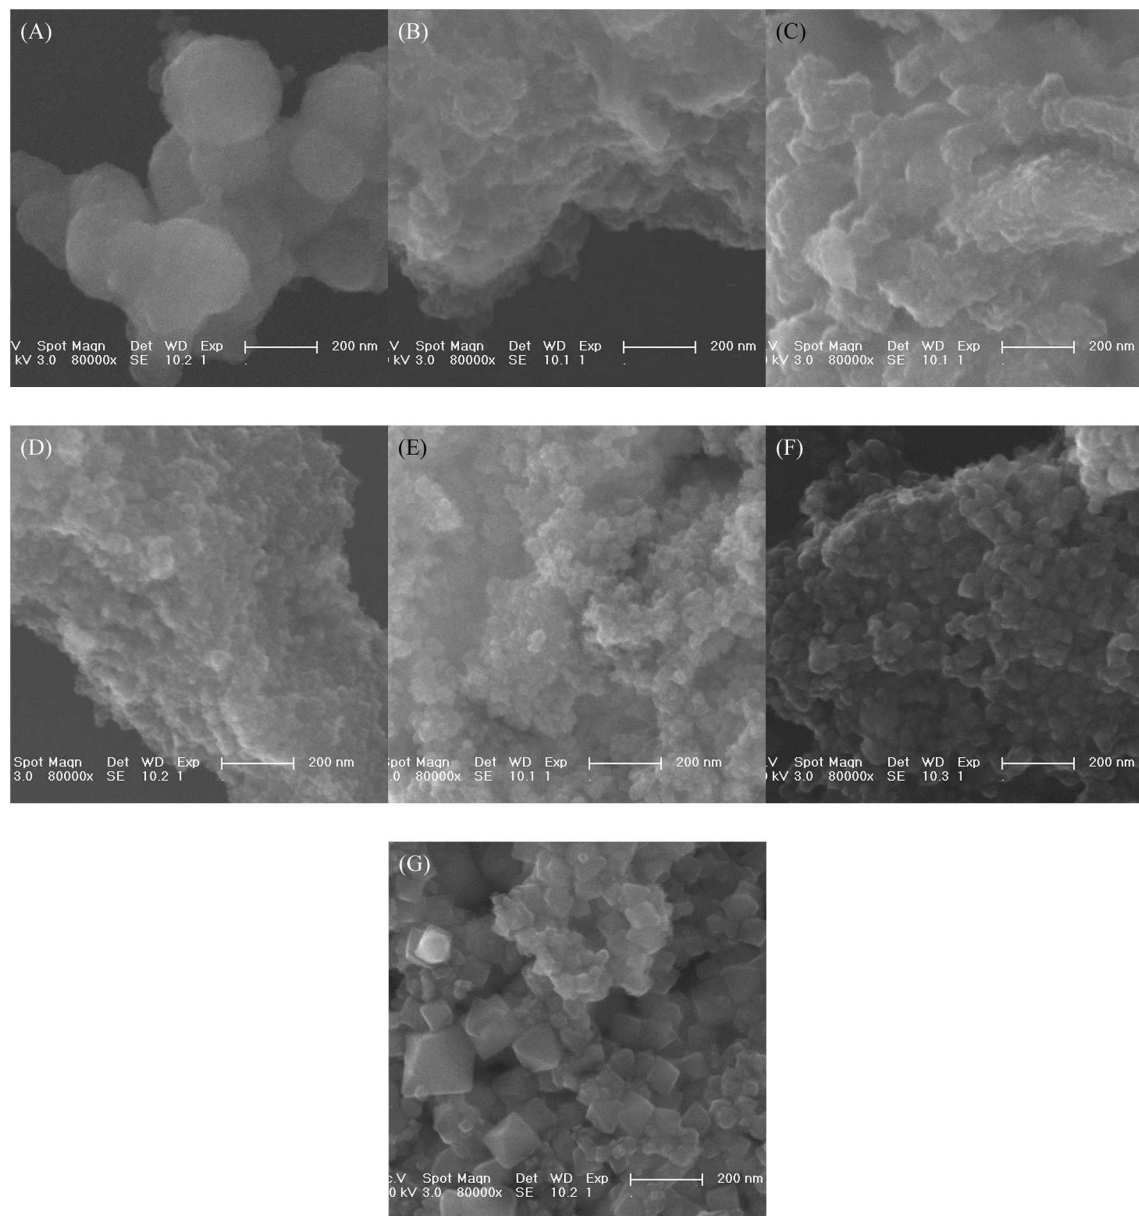

**Fig 5. SEM images of iron mud (A), MPs-1 (B), MPs-2 (C), MPs-3w(D), MPs-3 (E), MPs-4(F) and MPs-5(G).** MPs 1–5 were synthesized by changing the molar ratio of ascorbic acid to  $Fe^{3+}$  from 0.01 to 0.05, 0.1, 0.15 and 0.2. MPs-3w was prepared at the ratio of 0.1 with acid wastewater digestion.

<https://doi.org/10.1371/journal.pone.0191229.g005>

expressed as follows:

$$\frac{C_e}{q_e} = \frac{1}{K_L} + \frac{a_L}{K_L} C_e \quad (20)$$

$$\ln q_e = \ln K_F + b_f \ln C_e \quad (21)$$

$$\frac{C^e}{q^e} = \frac{1}{K_R} + \frac{a_R}{K_R} C^e \quad (22)$$

$$q_e = B \ln A + B \ln C_e \tag{23}$$

$$q_e = \frac{q_m (b_s C_e)^{\frac{1}{n}}}{1 + (b_s C_e)^{\frac{1}{n}}} \tag{24}$$

$$q_e = \frac{K_T C_e}{(a_T + C_e)^{\frac{1}{n}}} \tag{25}$$

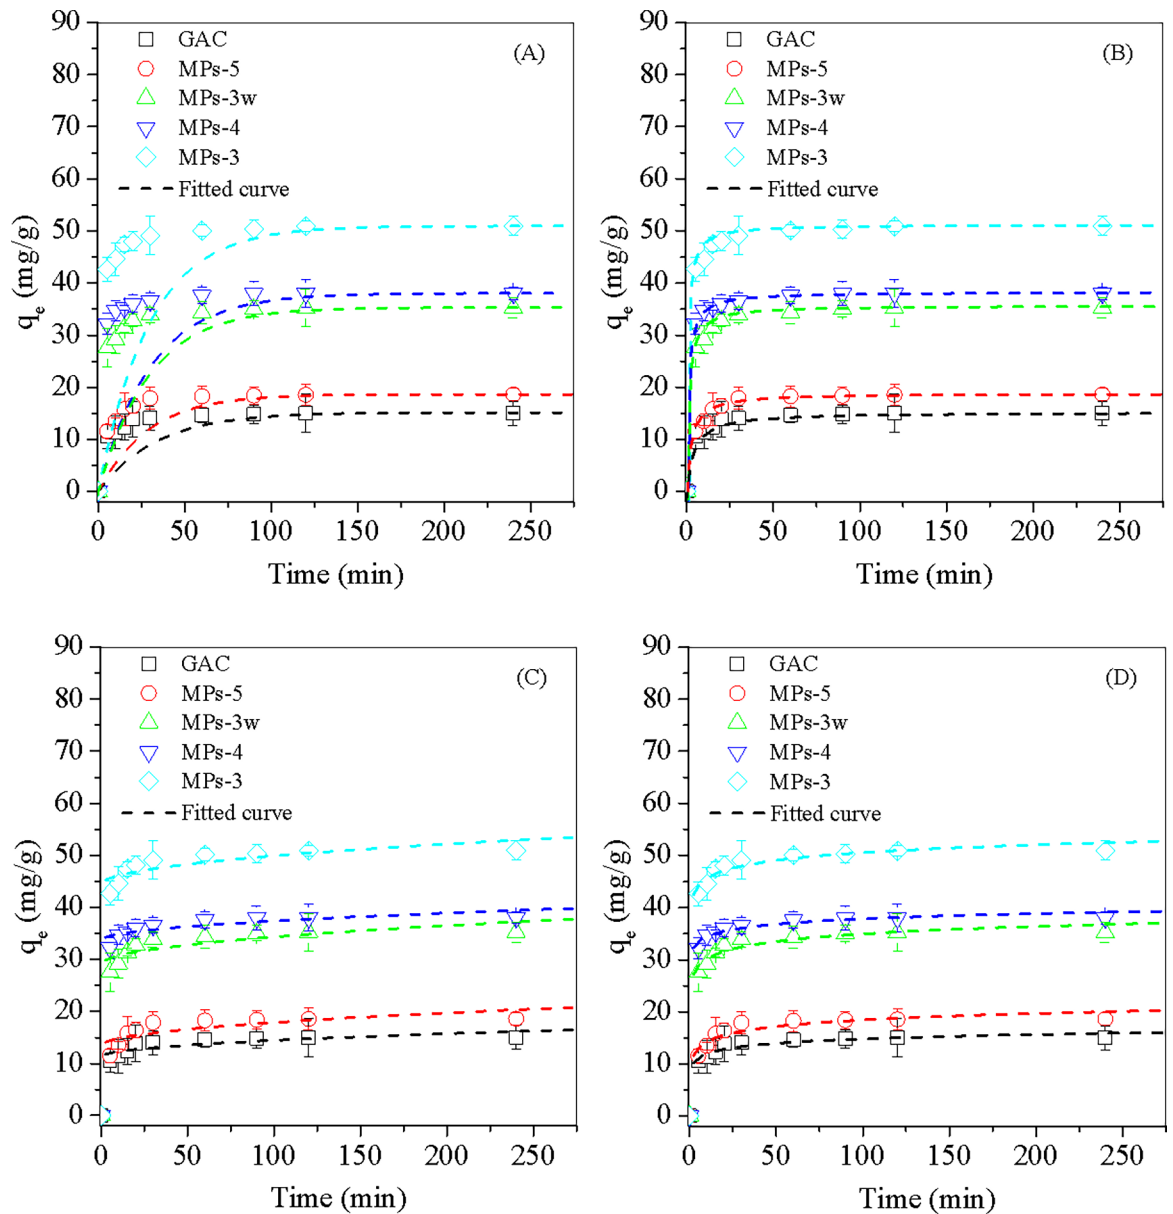

**Fig 6. Nonlinear Fitting curve of pseudo-first-order kinetic (A), pseudo-second-order kinetic (B), inter-particle diffusion (C) and Elovich kinetic (D) for MB adsorption on MPs and GAC.** Herein, MPs 3–5 were synthesized by changing the molar ratio of ascorbic acid to  $Fe^{3+}$  from 0.1 to 0.15 and 0.2, respectively. MPs-3w was prepared at the molar ratio of 0.1 with acid wastewater digestion.

<https://doi.org/10.1371/journal.pone.0191229.g006>

Table 1. Parameters and the regression coefficients ( $R^2$ ) of the kinetic models.

| Kinetic model            | Parameters                        | MPs-3              | MPs-4              | MPs-5  | MPs-3w | GAC    |
|--------------------------|-----------------------------------|--------------------|--------------------|--------|--------|--------|
| Pseudo-first-order       | $q_{e,exp}$ (mg/g)                | 50.95              | 38.04              | 18.66  | 35.32  | 15.17  |
|                          | $k_1$ (/min)                      | 0.034              | 0.033              | 0.035  | 0.034  | 0.03   |
|                          | $R^2$                             | 0.936              | 0.972              | 0.897  | 0.938  | 0.933  |
| Pseudo-second-order      | $q_{e,cal}$ (mg/g)                | 51.23              | 38.27              | 18.85  | 35.69  | 15.2   |
|                          | $k_2$ (g/mg. min)                 | 0.0254             | 0.0242             | 0.0198 | 0.0217 | 0.0156 |
|                          | $R^2$                             | 0.9992             | 0.9999             | 0.9999 | 0.9995 | 0.9997 |
| Intra-particle diffusion | $C$                               | 44.43              | 33.68              | 13.43  | 29.08  | 11.33  |
|                          | $k_i$ (mg/g. min <sup>1/2</sup> ) | 0.547              | 0.371              | 0.446  | 0.524  | 0.312  |
|                          | $R^2$                             | 0.6157             | 0.6253             | 0.5274 | 0.6055 | 0.6039 |
| Elovich equation         | $A$                               | $3.67 \times 10^8$ | $2.74 \times 10^9$ | 512    | 476007 | 2226   |
|                          | $B$                               | 0.466              | 0.686              | 0.556  | 0.485  | 0.818  |
|                          | $R^2$                             | 0.8523             | 0.8655             | 0.7863 | 0.8443 | 0.8352 |

<https://doi.org/10.1371/journal.pone.0191229.t001>

Where,  $K_L$  and  $a_L$  were the Langmuir isotherm constants;  $K_F$  and  $b_F$  were the Freundlich constants;  $K_R$ ,  $a_R$  and  $\beta$  were the Redlich-Peterson isotherm constants;  $A$  and  $B$  were the Tempkin isotherm constant;  $b_S$  and  $1/n$  were the Sips isotherm constant;  $K_T$ ,  $a_T$  and  $t$  were the Toth isotherm constant.

The non-linear fitting curves of the six isotherm models were shown in Fig 7, and the isotherm parameters of each model were calculated with the correlation coefficient ( $R^2$ ) as shown in S2 Table, in which the Langmuir and Redlich-Peterson isotherms fitted better for the experimental data than Freundlich, Tempkin, Sips and Toth isotherms. However, the constant  $\beta$  from the Redlich-Peterson isotherm was 0.95, closed to 1. When the constant  $\beta = 1$ , the equation of the Redlich-Peterson isotherm was reduced to the Langmuir isotherm [43]. Thus, it was concluded that the Langmuir isotherm provided the best description of the experimental data.

The Langmuir isotherm model was based on an idealized assumption of identical sorption heat and monolayer sorption. The calculated results from Langmuir isotherm showed that all MPs had higher capacity in MB adsorption than GAC (Fig 7A). Among MPs, the order for MB adsorption was MPs-3 > MPs-4 > MPs-3w > MPs-5 and the best adsorbent of MPs-3 had a capacity of MB adsorption 3.8 times of GAC. Because acid wastewater contained high content of  $Ca^{2+}$  (3736.1 mg/L) (S1 Table), gypsum phase was formed in MPs-3w, which negatively affected MB adsorption (Fig 7A). The adsorption isotherms was converted to Langmuir isotherm model for calculating adsorption capacity  $q_m$  (Fig 7B). MPs-3 demonstrated the highest capacity of 87.3 mg/g in MB adsorption, which was significantly higher than 61.8 mg/g and 56.7 mg/g of MPs-4 and MPs-3w, respectively. MPs-5 showed the lowest capacity of 27.4 mg/g. The highest MB adsorption capacity of MPs-3 may be related to its largest surface area, to which most functional groups were attached. With the increased HA/Fe<sup>3+</sup> ratio from MPs-3 to MPs-5, the average particle sizes increased, which reduced the unit surface area and functional groups on it.

**Regeneration and column experiments.** MPs-3 had the highest adsorption capacity among the synthesized MPs and was used for regeneration experiments. The effect of pH in desorption was shown in Fig 8A. It was found that the MB desorption efficiency reduced with increase of pH and the best pH for desorption was 1 (Fig 8A), which indicated competition between  $H^+$  and MB under acidic conditions favored MPs desorption, and pH 1 was selected for desorption. As shown in Fig 8B, at the end of five cycles, the efficiency of MB adsorption was 62%, slightly decreased from 67% of the first round, indicating MP-3 could be repeatedly used in MB adsorption.

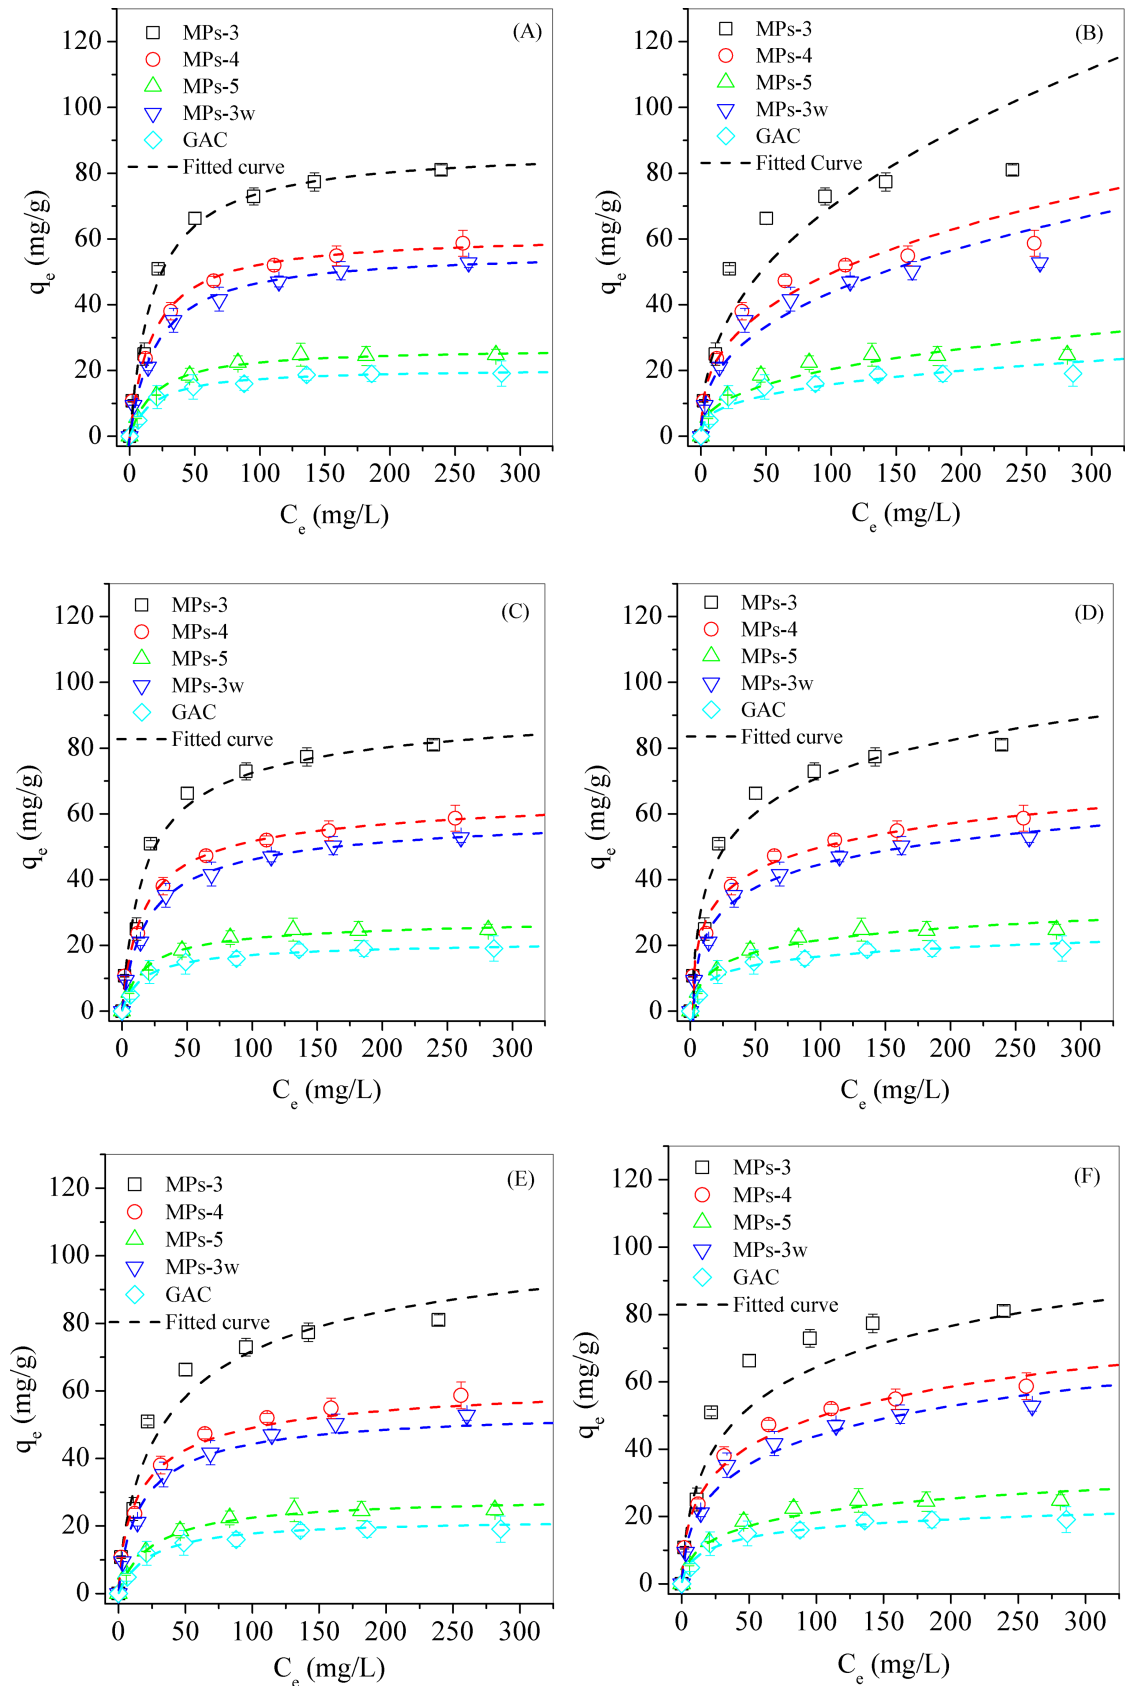

**Fig 7. Fitting curve of Langmuir (A), Freundlich (B), Redlich-Peterson (C), Templin (D), Sips (E) and Toth (F) isotherm for MB adsorption on MPs and GAC.** Herein, MPs 3–5 was synthesized by changing the molar ratio of ascorbic acid to  $Fe^{3+}$  from 0.1 to 0.15, 0.2. MPs-3w was prepared at the molar ratio of 0.1 with acid wastewater digestion.

<https://doi.org/10.1371/journal.pone.0191229.g007>

Column experiment was carried out and the breakthrough curve of MB adsorbed on MPs-3 was shown in Fig 9A. MPs-3 exhibited effective adsorption ability, and completely adsorbed MB from the influent before the breakthrough point. Pilot experiments of MPs-3 adsorption for MB was carried out as shown in Fig 9B. 49.7% of MB was removed by adding 0.75 g/L of MPs-3, while only 22% of MB was removed by adding the same dose of GAC. When MPs-3 was increased to 10 g/L, 99% of MB was removed, which was consistent with the MB removal by MPs-3 at the bench scale, indicated that MPs-3 was effective in removing MB at the pilot scale.

To determine whether MPs-3 was practical in industrial application, a cost analysis was carried out in treating a synthesized dye wastewater containing MB. It was assumed to remove 99% of MB from 1 ton of wastewater containing 100 mg/L MB, and 10 kg of MPs-3 was used, which needed about US\$ 6.54 for synthesis (S3 Table). It was much lower than the cost of GAC (US\$ 52) to treat the same amount MB. In addition, MPs-3 could be repeatedly used after regeneration, which further reduced the cost for MPs-3 to treat MB-containing wastewater.

**The mechanism of MB adsorption.** To investigate the effect of surface area on MB adsorption,  $N_2$  adsorption isotherms were made for MPs and GAC. It was demonstrated that GAC was much more favorable in adsorption of inert  $N_2$  gas than MPs, indicating GAC had much larger surface area than MPs (Fig 10). Indeed, the BET surface area for GAC was 442.8  $m^2/g$ , much larger than 33.6  $m^2/g$ , 79.1  $m^2/g$ , 118.9  $m^2/g$  and 176.2,  $m^2/g$  for MPs-5, MPs-4, MPs-3w and MPs-3, respectively. The high surface area and low MB adsorption capacity of GAC indicated that the surface area was not playing primary role in MB adsorption. Among the MPs, the BET surface area decreased in the order of MPs-3 > MPs-4 > MPs-5, which was consistent with the MB adsorption capacity, indicating the  $Fe-O^-$  functional groups on  $Fe_3O_4$

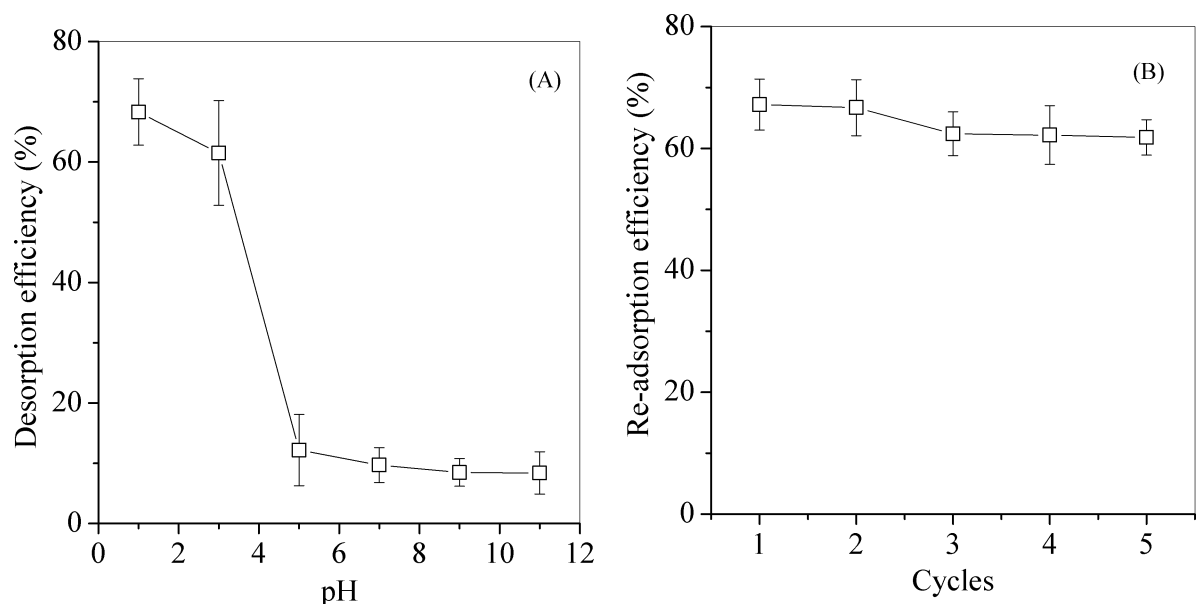

**Fig 8.** The desorption (A) and re-adsorption (B) efficiency of MPs-3 for MB removal.

<https://doi.org/10.1371/journal.pone.0191229.g008>

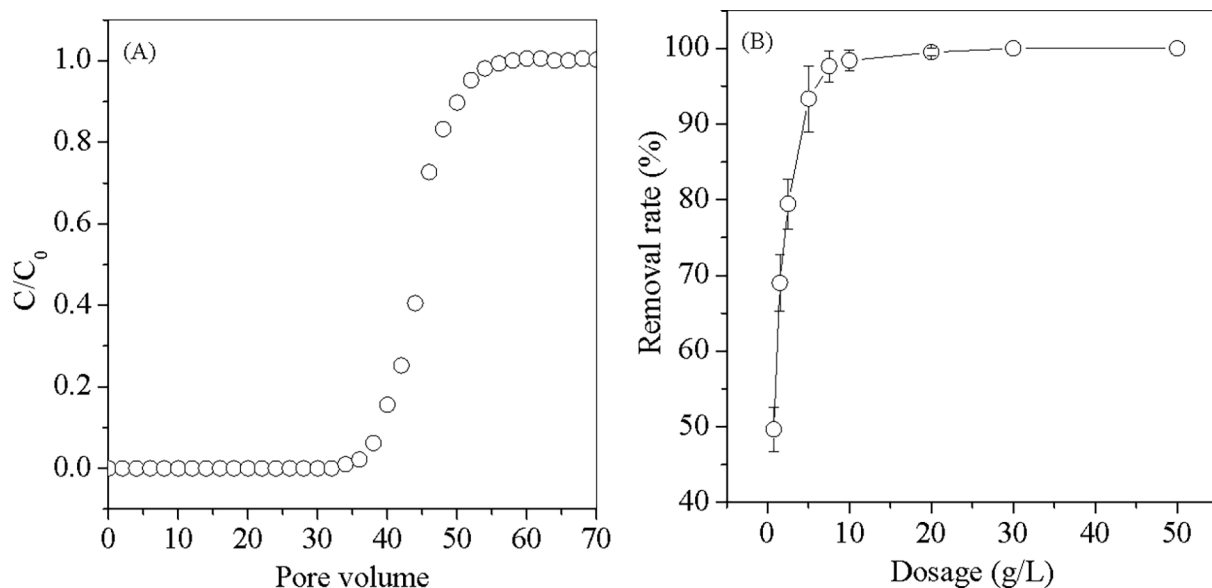

**Fig 9.** Breakthrough curve (A) and Removal rate (B) of MB adsorption by MPs-3.

<https://doi.org/10.1371/journal.pone.0191229.g009>

surface played a significant role in MB adsorption. The bigger the surface area, the more Fe-O<sup>-</sup> functional groups it contained, and the better adsorption for MB. The cation exchange capacity (CEC) of MPs was further tested with NH<sub>4</sub><sup>+</sup>-Na methods. As expected, MPs-3 showed the highest CEC, followed by MPs-4 and MPs-5 (Table 2), which provided direct evidence that cation exchange was the mechanism for MB adsorption.

The zeta potentials of MPs were shown in Fig 11 and pHzpc of MPs was calculated at the zeta potential of 0 mV. The pHzpc for MPs-3w and MPs 3–5 was 3.15, 2.98, 2.83 and 2.69, respectively. During the batch adsorption of MB, the pH of MB solution changed between 7.1 and 7.3, and thus all MPs have negative charges on their surfaces. The pK<sub>1</sub> of MB was 4.5 [44]. At pH > pK<sub>1</sub>, the =N- in MB molecules was protonated and the cationic MB was formed. Therefore, the cationic MB was adsorbed onto the negative charged surface of MPs by electrostatic attraction.

To determine the interaction of MB with MPs during adsorption, the infrared spectra of MB adsorbed onto MPs-3 and MPs-3w was analyzed as shown in Fig 12A. It was demonstrated in the MPs-3 and MPs-3w spectrum that the peaks at 590 cm<sup>-1</sup> corresponded to the stretching mode of Fe-O in Fe<sub>3</sub>O<sub>4</sub>, and peaks at 1624 cm<sup>-1</sup> were related to the O-H functional groups [45]. After MB was adsorbed, the peaks of O-H groups shifted from 1624 cm<sup>-1</sup> to 1646 cm<sup>-1</sup>, which indicated the O-H group participated in MB adsorption. The peaks appeared at 836, 874 and 1383 cm<sup>-1</sup> were ascribed to wagging vibration of C-H in the alkyl group and aromatic ring of MB, respectively [46]. Other peaks appeared at 1159 cm<sup>-1</sup> and 1118 cm<sup>-1</sup> after adsorption were attributed to the asymmetric vibration of C=S and stretching vibrations of C-S-C, respectively [46]. This indicated that MB was adsorbed onto MPs. The infrared spectra of MB adsorbed onto MPs-4 and MPs-5 in Fig 12B showed similar peaks with MPs-3.

Three typical functional groups of  $\equiv\text{FeOH}_2^+$ ,  $\equiv\text{FeOH}$  and  $\equiv\text{FeO}^-$  were generated and present on the surface of MPs [47]. These functional groups were mostly ionized to the negatively charged  $\equiv\text{FeO}^-$  at alkaline condition and showed weakly acidic ion exchange property. Under alkaline conditions, it was attached by Na<sup>+</sup> to form  $\equiv\text{FeO-Na}^+$  through electrostatic forces [38, 48]. Na<sup>+</sup> had relative lower affinity to the  $\equiv\text{FeO}^-$  functional group and the attached Na<sup>+</sup> could be favorably replaced by MB [37, 47]. The possible reactions related to the MB adsorption are



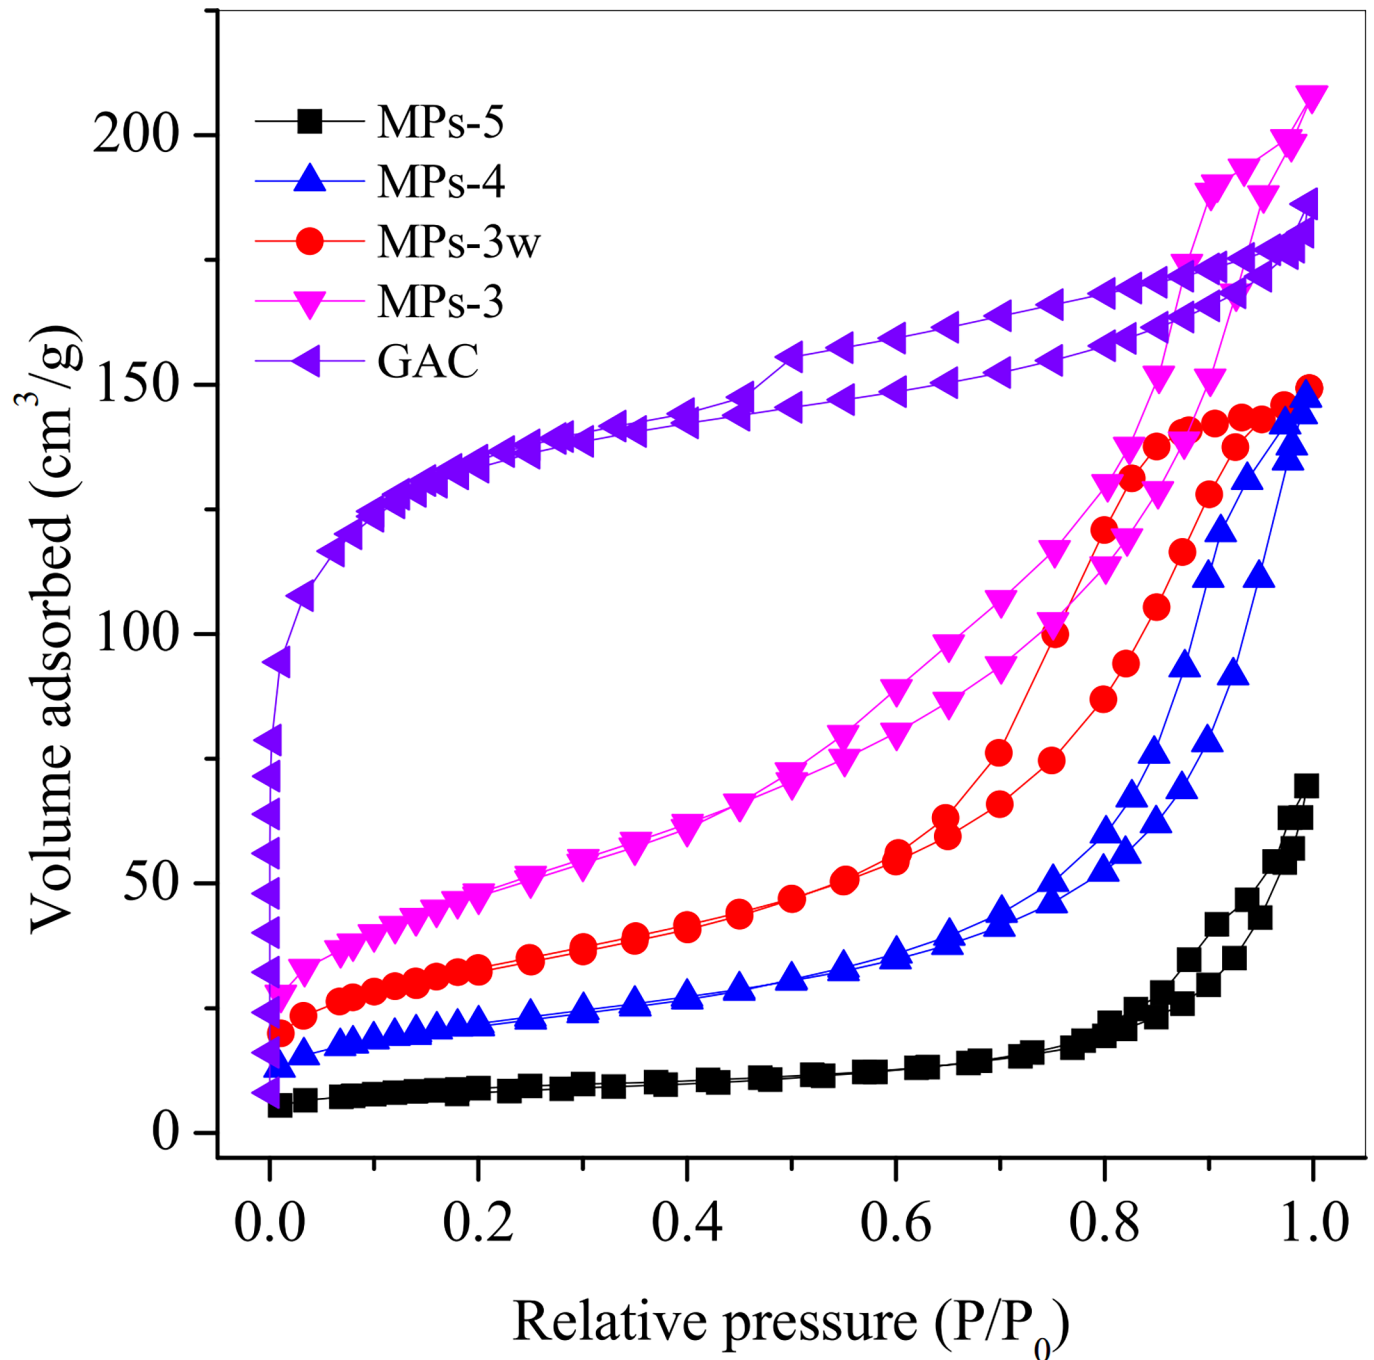

**Fig 10. N<sub>2</sub> adsorption isotherms of MPs and GAC.** Herein, MPs 3–5 were synthesized by changing the molar ratio of ascorbic acid to Fe<sup>3+</sup> from 0.1 to 0.15, 0.2, separately. MPs-3w was prepared at the molar ratio of 0.1 by acid wastewater digestion.

<https://doi.org/10.1371/journal.pone.0191229.g010>

**Table 2. Cation exchange capacity of MPs by NH<sub>4</sub>-Na test. (Unit: Mmol/kg).**

| cation          | MPs-3w | MPs-3   | MPs-4   | MPs-5 |
|-----------------|--------|---------|---------|-------|
| Na <sup>+</sup> | 840.12 | 1378.76 | 1085.13 | 271.4 |

<https://doi.org/10.1371/journal.pone.0191229.t002>

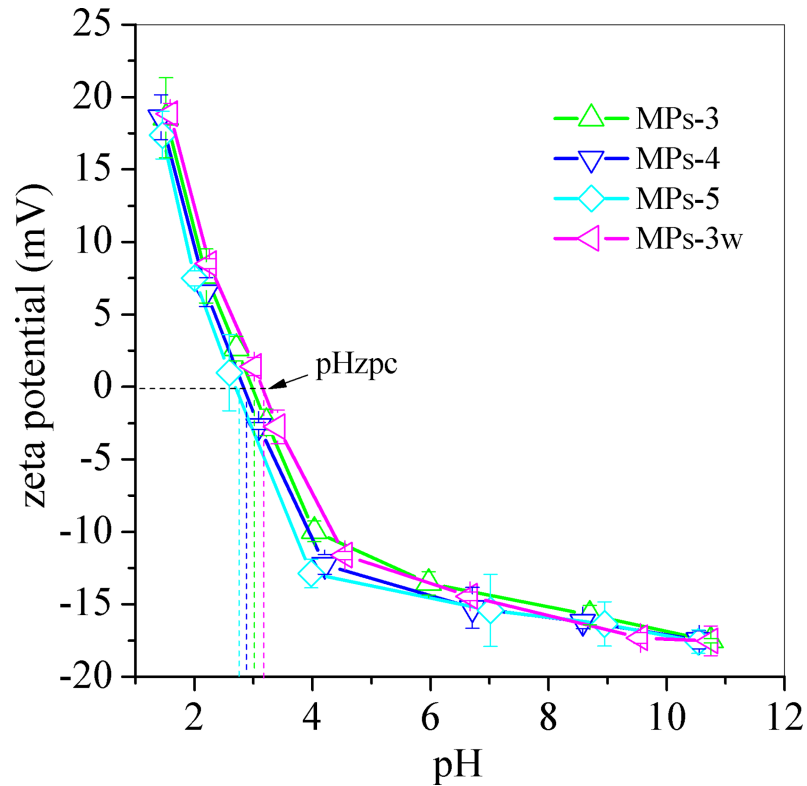

**Fig 11. zeta potential variation of MPs.** Herein, MPs 3–5 were synthesized by changing the molar ratio of ascorbic acid to  $Fe^{3+}$  from 0.1 to 0.15, 0.2, separately. MPs-3w was prepared at the molar ratio of 0.1 by acid wastewater digestion.

<https://doi.org/10.1371/journal.pone.0191229.g011>

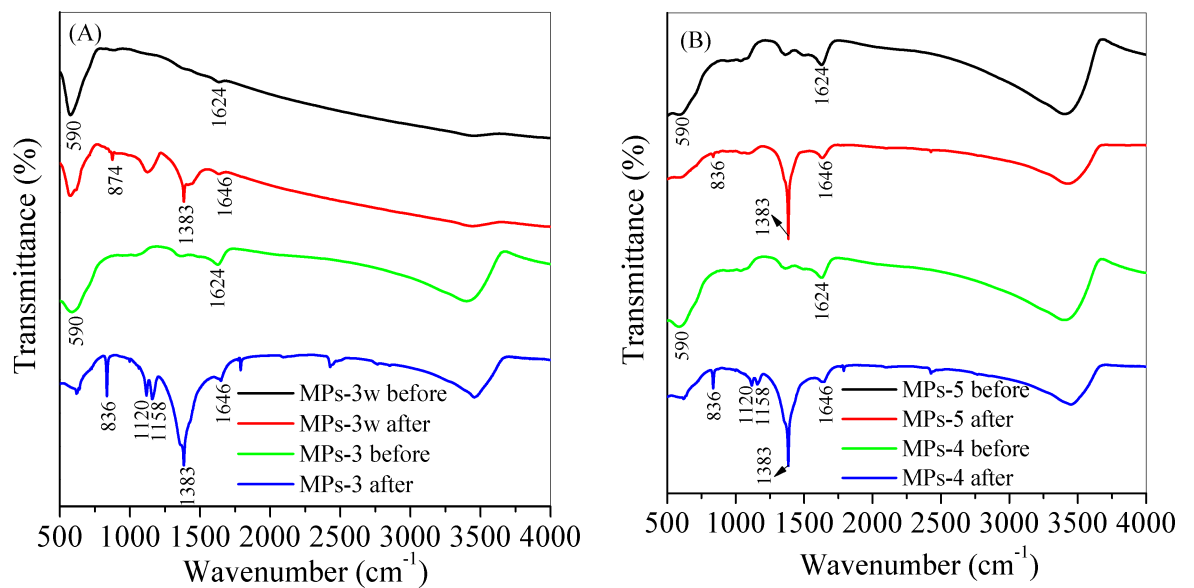

**Fig 12. Infrared spectra of MPs-3w and MPs-3w (A), and MPs-4 and MPs-5 (B) before and after MB adsorption.** Herein, MPs 3–5 was synthesized by changing the molar ratio of ascorbic acid to  $Fe^{3+}$  from 0.1 to 0.15, 0.2, respectively. MPs-3w was prepared at the molar ratio of 0.1 by acid wastewater digestion.

<https://doi.org/10.1371/journal.pone.0191229.g012>

described below:

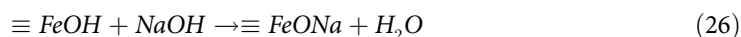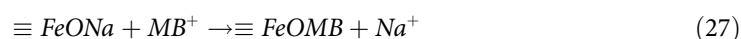

## Conclusion

Iron mud, a negatively valued waste from groundwater treatment plant, was successfully converted to a magnetic cation exchanger for MB adsorption by simple  $\text{Fe}^{3+}/\text{Fe}^{2+}$  coprecipitation with  $\text{H}_2\text{A}$  as reduction reagent. The synthesized MPs-3 with the  $\text{H}_2\text{A}/\text{Fe}^{3+}$  ratio of 0.1 had an Ms of 4.6 emu/g and highest MB adsorption capacity of 87.3 mg/g. The adsorption of MB onto MPs was in agreement with the Langmuir isotherm model and the adsorption kinetics fitted well with the pseudo-second-order model. When the dissolving reagent of nitric acid was replaced by acid wastewater, the generated MPs-3w also showed significant magnetic response and MB adsorption capacity of 56.7 mg/g. Our study demonstrated that cation exchange and electrostatic attraction, not surface area, were the major mechanism for MB adsorption. The magnetic adsorbent synthesized from negatively-valued iron mud waste using an environment-friendly method had a good potential for effective treatment of dye wastewater.

## Supporting information

**S1 Table. Characteristics of the acid wastewater and the supernatant.** (Unit: Mg/L).  
(DOC)

**S2 Table. Parameters and the regression coefficients ( $R^2$ ) of the isotherm models.**  
(DOC)

**S3 Table. The cost for MPs-3 synthesis.**  
(DOC)

## Author Contributions

**Data curation:** Jiancong Liu, Suiyi Zhu, Dejun Bian.

**Formal analysis:** Jiancong Liu, Suiyi Zhu, Dejun Bian.

**Funding acquisition:** Mingxin Huo.

**Investigation:** Jiancong Liu, Suiyi Zhu.

**Methodology:** Suiyi Zhu, Wei Fan.

**Project administration:** Jian Song, Mingxin Huo.

**Resources:** Jiakuan Yang.

**Software:** Yang Yu, Jian Song, Wei Fan, Hongbin Yu.

**Supervision:** Mingxin Huo.

**Validation:** Hongbin Yu.

**Writing – original draft:** Yang Yu, Suiyi Zhu.

**Writing – review & editing:** Jiakuan Yang, Mingxin Huo.

## References

1. Ngatenah SNI, Kutty SRM, Isa MH, editors. Optimization of heavy metal removal from aqueous solution using groundwater treatment plant sludge (GWTPS). International Conference on Environment (ICENV); 2010; Penang, Malaysia.
2. Zhu S, Fang S, Huo M, Yu Y, Chen Y, Yang X, et al. A novel conversion of the groundwater treatment sludge to magnetic particles for the adsorption of methylene blue. *Journal of Hazardous Materials*. 2015; 292:173–9. <https://doi.org/10.1016/j.jhazmat.2015.03.028> PMID: 25804792
3. Mayes WM, Burke IT, Gomes HI, Anton AD, Molnár M, Feigl V, et al. Advances in understanding environmental risks of red mud after the Ajka Spill, Hungary. *Journal of Sustainable Metallurgy*. 2016; 2(4):332–43. <https://doi.org/10.1007/s40831-016-0050-z>
4. Akin I, Arslan G, Tor A, Ersoz M, Cengeloglu Y. Arsenic(V) removal from underground water by magnetic nanoparticles synthesized from waste red mud. *Journal of Hazardous Materials*. 2012; 235–236:62–8. <https://doi.org/10.1016/j.jhazmat.2012.06.024> PMID: 22846216
5. Hills CD, Koe L, Sollars CJ, Perry R. Early heat of hydration during the solidification of a metal plating sludge. *Cement and Concrete Research*. 1992; 22(5):822–32. [http://dx.doi.org/10.1016/0008-8846\(92\)90106-6](http://dx.doi.org/10.1016/0008-8846(92)90106-6).
6. Blanchard JM, Murat M. Recovery of chemicals from waste iron sulfate. A laboratory test of the production of iron chloride and/or electrolytic iron. *Resources and Conservation*. 1981; 6(1):21–7. [http://dx.doi.org/10.1016/0166-3097\(81\)90004-3](http://dx.doi.org/10.1016/0166-3097(81)90004-3).
7. Sales A, Souza FRD. Concretes and mortars recycled with water treatment sludge and construction and demolition rubble. *Construction & Building Materials*. 2009; 23(6):2362–70.
8. Costa R, Moura F, Oliveira P. Controlled reduction of red mud waste to produce active systems for environmental applications: Heterogeneous Fenton reaction and reduction of Cr(VI). *Chemosphere*. 2010; 78(9):1116–20. <https://doi.org/10.1016/j.chemosphere.2009.12.032> PMID: 20060564
9. Li X-B, Liu N, Qi T-G, Wang Y-L, Zhou Q-S, Peng Z-H, et al. Conversion of ferric oxide to magnetite by hydrothermal reduction in Bayer digestion process. *Transactions of Nonferrous Metals Society of China*. 2015; 25(10):3467–74. [http://dx.doi.org/10.1016/S1003-6326\(15\)63984-X](http://dx.doi.org/10.1016/S1003-6326(15)63984-X).
10. Liu Y, Zhao B, Tang Y, Wan P, Chen Y, Lv Z. Recycling of iron from red mud by magnetic separation after co-roasting with pyrite. *Thermochimica Acta*. 2014; 588:11–5. <https://doi.org/10.1016/j.tca.2014.04.027>.
11. Sushil S, Alabdulrahman AM, Balakrishnan M, Batra VS, Blackley RA, Clapp J, et al. Carbon deposition and phase transformations in red mud on exposure to methane. *Journal of Hazardous Materials*. 2010; 180(1–3):409–18. <https://doi.org/10.1016/j.jhazmat.2010.04.046> PMID: 20462696
12. Man Y, Feng J. Effect of gas composition on reduction behavior in red mud and iron ore pellets. *Powder Technology*. 2016; 301:674–8.
13. Laurent S, Forge D, Port M, Roch A, Robic C, Elst LV, et al. Magnetic iron oxide nanoparticles: synthesis, stabilization, vectorization, physicochemical characterizations, and biological applications. *Chemical Reviews*. 2008; 108(6):2064–110. <https://doi.org/10.1021/cr068445e> PMID: 18543879
14. Wu S, Sun A, Zhai F, Wang J, Xu W, Zhang Q, et al. Fe<sub>3</sub>O<sub>4</sub> magnetic nanoparticles synthesis from tailings by ultrasonic chemical co-precipitation. *Materials Letters*. 2011; 65(12):1882–4.
15. Khorasani-Motlagh M, Noroozifar M, Shahroosvand H. A new reduction route for the synthesis of nano-scale metals and metal oxides with ascorbic acid at low temperature. *Journal of the Iranian Chemical Society*. 2010; 7(2):113–22.
16. Hou X, Huang X, Ai Z, Zhao J, Zhang L. Ascorbic acid/Fe@Fe<sub>2</sub>O<sub>3</sub>: A highly efficient combined Fenton reagent to remove organic contaminants. *Journal of Hazardous Materials*. 2016; 310:170–8. <https://doi.org/10.1016/j.jhazmat.2016.01.020> PMID: 26921510
17. Gupta H, Paul P, Kumar N, Baxi S, Das DP. One pot synthesis of water-dispersible dehydroascorbic acid coated Fe<sub>3</sub>O<sub>4</sub> nanoparticles under atmospheric air: Blood cell compatibility and enhanced magnetic resonance imaging. *Journal of Colloid & Interface Science*. 2014; 430:221–8.
18. Nene A, Takahashi M, Wakita K, Umeno M. Size controlled synthesis of Fe<sub>3</sub>O<sub>4</sub> nanoparticles by ascorbic acid mediated reduction of Fe(acac)<sub>3</sub> without using capping agent. *Journal of Nano Research*. 2016; 40:8–19.
19. Ramasamy V, Anandalakshmi K. The determination of kaolinite clay content in limestones of western Tamil Nadu by methylene blue adsorption using UV–vis spectroscopy. *Spectrochimica Acta Part A Molecular & Biomolecular Spectroscopy*. 2008; 70(1):25–9.
20. Yan H, Zhang W, Kan X, Dong L, Jiang Z, Li H, et al. Sorption of methylene blue by carboxymethyl cellulose and reuse process in a secondary sorption ☆. *Colloids & Surfaces A Physicochemical & Engineering Aspects*. 2011; 380(1–3):143–51.

21. Fredrickson JK, Zachara JM, Kukkadapu RK, Gorby YA, Smith SC, Brown CF. Biotransformation of Ni-substituted hydrous ferric oxide by an Fe(III)-reducing bacterium. *Environmental Science & Technology*. 2001; 35(4):703–12.
22. Bai LJ, Wang JY, Cui NJ, Zhang Y. The ESR and UV-VIS Studies on the Reaction Between Ascorbic Acid and Iron Ion. *Acta biochimica et biophysica Sinica*. 1997; 29(6):527–32. PMID: [12215764](#)
23. Yang W, Wang H, Zhao X. Study on the complexation reaction of ascorbic acid with Fe (II) by thin layer chromatography /in-situ absorption spectrometry. *Chinese Journal of Analytical Chemistry*. 1996:828–31.
24. Bode AM, Cunningham L, Rose RC. Spontaneous decay of oxidized ascorbic acid (dehydro-L-ascorbic acid) evaluated by high-pressure liquid chromatography. *Clinical Chemistry*. 1990; 36(10):1807–9. PMID: [2208658](#)
25. Ghosh SK, Gould ES. Electron transfer. 97. The iron-catalyzed reduction of peroxide-bound chromium (IV) with ascorbic acid. *Inorganic Chemistry*. 1989; 28(8):1538–42.
26. Takamura K, Ito M. Effects of metal ions and flavonoids on the oxidation of ascorbic acid. *Chemical & Pharmaceutical Bulletin*. 1977; 25(12):3218–25.
27. Yu Y, Christopher LP. Detoxification of hemicellulose-rich poplar hydrolysate by polymeric resins for improved ethanol fermentability. *Fuel*. 2017; 203:187–96. <https://doi.org/10.1016/j.fuel.2017.04.118>.
28. Simpson GL, Ortworth BJ. The non-oxidative degradation of ascorbic acid at physiological conditions. *Biochimica Et Biophysica Acta*. 2000; 1501(1):12–24. PMID: [10727845](#)
29. Tran HL, Tran TD, Vo TV. Promising iron oxide-based magnetic nanoparticles in biomedical engineering. *Archives of Pharmacal Research*. 2012; 35(12):2045–61. <https://doi.org/10.1007/s12272-012-1203-7> PMID: [23263800](#)
30. Wu S. Preparation of fine copper powder using ascorbic acid as reducing agent and its application in MLCC. *Materials Letters*. 2007; 61(4–5):1125–9.
31. Chen F, Xie S, Zhang J, Liu R. Synthesis of spherical Fe<sub>3</sub>O<sub>4</sub> magnetic nanoparticles by co-precipitation in choline chloride/urea deep eutectic solvent. *Materials Letters*. 2013; 112:177–9. <https://doi.org/10.1016/j.matlet.2013.09.022>.
32. Alibeigi S, Vaezi MR. Phase Transformation of Iron Oxide Nanoparticles by Varying the Molar Ratio of Fe<sup>2+</sup>:Fe<sup>3+</sup>. *Chemical Engineering & Technology*. 2008; 31(11):1591–6.
33. Iida H, Takayanagi K, Nakanishi T, Osaka T. Synthesis of Fe<sub>3</sub>O<sub>4</sub> nanoparticles with various sizes and magnetic properties by controlled hydrolysis. *Journal of Colloid and Interface Science*. 2007; 314(1):274–80. <https://doi.org/10.1016/j.jcis.2007.05.047> PMID: [17568605](#)
34. Chang Z, Li F, Duan X, Zhang ML. Preparation and Character Study of the Magnetic Nano-Size Solid Acid Catalyst. *Chinese Journal of Inorganic Chemistry*. 2001; 17(3):366–72.
35. Jia Y, Xu L, Zhen F, Demopoulos GP. Observation of Surface Precipitation of Arsenate on Ferrihydrite. *Environmental Science & Technology*. 2006; 40(10):3248–53.
36. Zuhaimi NAS, Indran VP, Deraman MA, Mudrikah NF, Maniam GP, Taufiq-Yap YH, et al. Reusable gypsum based catalyst for synthesis of glycerol carbonate from glycerol and urea. *Applied Catalysis A: General*. 2015; 502:312–9. <http://dx.doi.org/10.1016/j.apcata.2015.06.024>.
37. Zhang C, Yu Z, Zeng G, Huang B, Dong H, Huang J, et al. Phase transformation of crystalline iron oxides and their adsorption abilities for Pb and Cd. *Chemical Engineering Journal*. 2016; 284:247–59. <https://doi.org/10.1016/j.cej.2015.08.096>.
38. Shao Z, Chen J. Study on ion adsorption characteristics of some iron oxides. *Acta Pedologica Sinica*. 1984; 21(2):153–62.
39. Sajih M, Bryan ND, Livens FR, Vaughan DJ, Descostes M, Phrommavanh V, et al. Adsorption of radium and barium on goethite and ferrihydrite: A kinetic and surface complexation modelling study. *Geochimica Et Cosmochimica Acta*. 2014; 146(146):150–63.
40. Zong Y, Xin H, Zhang J, Li X, Feng J, Deng X, et al. One-pot, template- and surfactant-free solvothermal synthesis of high-crystalline Fe<sub>3</sub>O<sub>4</sub> nanostructures with adjustable morphologies and high magnetization. *Journal of Magnetism and Magnetic Materials*. 2017; 423:321–6. <https://doi.org/10.1016/j.jmmm.2016.09.132>.
41. Gong X, Li J, Lin Y, Liu X, Chen L, Li J, et al. Formation of highly crystalline maghemite nanoparticles from ferrihydrite in the liquid phase. *Chinese Science Bulletin*. 2014; 59(29):3904–11. <https://doi.org/10.1007/s11434-014-0520-2>
42. Elovich SY, Larionov OG. Theory of adsorption from nonelectrolyte solutions on solid adsorbents. *Bulletin of the Academy of Sciences of the USSR Division of Chemical Science*. 1962; 11(2):191–7.
43. Allen SJ, McKay G, Porter JF. Adsorption isotherm models for basic dye adsorption by peat in single and binary component systems. *Journal of Colloid & Interface Science*. 2004; 280(2):322–33.

44. Snehalatha T. Methylene Blue—Ascorbic Acid: An Undergraduate Experiment in Kinetics. *Journal of Chemical Education*. 1997; 74(2):228–33.
45. Yang K, Peng H, Wen Y, Li N. Re-examination of characteristic FTIR spectrum of secondary layer in bilayer oleic acid-coated Fe<sub>3</sub>O<sub>4</sub> nanoparticles. *Applied Surface Science*. 2010; 256(10):3093–7. <http://dx.doi.org/10.1016/j.apsusc.2009.11.079>.
46. Ovchinnikov OV, Evtukhova AV, Kondratenko TS, Smirnov MS, Khokhlov VY, Erina OV. Manifestation of intermolecular interactions in FTIR spectra of methylene blue molecules. *Vibrational Spectroscopy*. 2016; 86:181–9.
47. Li FW, Wu X, Ma SJ, Xu ZJ, Liu WH, Liu F. Adsorption and desorption mechanisms of methylene blue removal with iron-oxide coated porous ceramic filter. *Journal of Water Resource & Protection*. 2009; 1(1):35–40.
48. Yukselen Y, Kaya A. Suitability of the methylene blue test for surface area, cation exchange capacity and swell potential determination of clayey soils. *Engineering Geology*. 2008; 102(1–2):38–45. <https://doi.org/10.1016/j.enggeo.2008.07.002>
